# Supplementary material for: Provider attitudes about childhood tuberculosis prevention in Lesotho: a qualitative study
Source: PubMed Central journal article supplement (PMC7249694; doi:10.1186/s12913-020-05324-0), 2020-05-25
Supplement: 12913_2020_5324_MOESM1_ESM.pdf [file 12913_2020_5324_MOESM1_ESM.pdf]

**PROVIDER INTERVIEW GUIDE**  
**EXPLORATORY PRE-INTERVENTION**

| #                                                                       | Primary Question                                                                 | Secondary Question                                                                                                                                                                                                                                                  |
|-------------------------------------------------------------------------|----------------------------------------------------------------------------------|---------------------------------------------------------------------------------------------------------------------------------------------------------------------------------------------------------------------------------------------------------------------|
| <b>1. Introduction and general information</b>                          |                                                                                  |                                                                                                                                                                                                                                                                     |
| I would like to start off by talking about your work in this TB clinic. |                                                                                  |                                                                                                                                                                                                                                                                     |
| 1.1                                                                     | Please tell me about your work at this facility.                                 | <ul style="list-style-type: none"> <li>• What are your responsibilities?</li> <li>• How long have you worked here?</li> <li>• Has your position changed since you started working here? How?</li> </ul>                                                             |
| 1.2                                                                     | Can you tell me about the patients you care for?                                 | <ul style="list-style-type: none"> <li>• Do you screen patients for TB every day or on certain days of the week?<br/>– How about providing TB treatment?</li> <li>• Do you screen children for TB in this clinic? <b>IF YES</b>, how often?</li> </ul>              |
| 1.3                                                                     | Can you tell me about a ‘typical’ day in your clinic?                            |                                                                                                                                                                                                                                                                     |
| 1.4                                                                     | What do you think about the TB situation in this community?                      |                                                                                                                                                                                                                                                                     |
| 1.5                                                                     | How do you feel about providing services for persons with TB?                    | <ul style="list-style-type: none"> <li>• How do you feel about providing TB services to children?</li> </ul>                                                                                                                                                        |
| <b>2. Training needs</b>                                                |                                                                                  |                                                                                                                                                                                                                                                                     |
| Now let’s talk about training you received and training needs.          |                                                                                  |                                                                                                                                                                                                                                                                     |
| 2.1                                                                     | What training have you received in TB?                                           | <ul style="list-style-type: none"> <li>• Tell me about your in/formal education/on-the-job training or continuing education.</li> <li>• When were you trained/by whom?</li> </ul>                                                                                   |
| 2.2                                                                     | Have you received any training on TB contact screening?                          | <ul style="list-style-type: none"> <li>• How well prepared do you feel to deal with TB contact tracing?</li> </ul>                                                                                                                                                  |
| 2.3                                                                     | Have you received any training on IPT provision?                                 | <ul style="list-style-type: none"> <li>• How well prepared do you feel to deal with IPT?</li> </ul>                                                                                                                                                                 |
| 2.4                                                                     | What do you think about the training you have received?                          | <ul style="list-style-type: none"> <li>• How satisfied or dissatisfied are you with the training you received?</li> <li>• Do you want to have access to more information? <b>IF YES</b>, what content would be helpful? How would you like it delivered?</li> </ul> |
| 2.5                                                                     | How does your program ensure health workers are trained adequately on TB?        |                                                                                                                                                                                                                                                                     |
| 2.6                                                                     | How often do staff turnover or change in this facility?                          |                                                                                                                                                                                                                                                                     |
| <b>3. Attitudes towards TB prevention</b>                               |                                                                                  |                                                                                                                                                                                                                                                                     |
| Now I would like to talk with you about TB prevention                   |                                                                                  |                                                                                                                                                                                                                                                                     |
| 3.1                                                                     | What are your thoughts about screening child contacts of TB patients?            |                                                                                                                                                                                                                                                                     |
| 3.2                                                                     | What about starting child contacts on IPT?                                       |                                                                                                                                                                                                                                                                     |
| 3.3                                                                     | What are your thoughts about testing ALL child contacts for TB?                  |                                                                                                                                                                                                                                                                     |
| 3.4                                                                     | In your experience, what are the benefits of providing TB prevention services?   |                                                                                                                                                                                                                                                                     |
| 3.5                                                                     | In your experience, what are the challenges of providing TB prevention services? |                                                                                                                                                                                                                                                                     |

|                                                                                                                                                                         |                                                                                                                                |                                                                                                                                                                                                                                                                                               |
|-------------------------------------------------------------------------------------------------------------------------------------------------------------------------|--------------------------------------------------------------------------------------------------------------------------------|-----------------------------------------------------------------------------------------------------------------------------------------------------------------------------------------------------------------------------------------------------------------------------------------------|
| 3.6                                                                                                                                                                     | Given your experience, what are other challenges with implementation of TB prevention services?                                | <ul style="list-style-type: none"> <li>• Have you encountered challenges with IPT, e.g., patient issues, inadequate resources, dissemination problems?</li> </ul>                                                                                                                             |
| <b>4.Implementation</b>                                                                                                                                                 |                                                                                                                                |                                                                                                                                                                                                                                                                                               |
| Now let's talk about the IPT tools that were recently introduced in Berea District. These tools include a child contact tracing register and a facility-based IPT card. |                                                                                                                                |                                                                                                                                                                                                                                                                                               |
| 4.1                                                                                                                                                                     | How have TB prevention services changed or not changed in the last 3-4 months?                                                 |                                                                                                                                                                                                                                                                                               |
| 4.2                                                                                                                                                                     | What do you do if a patient refuses to bring in their child contacts for TB screening?                                         |                                                                                                                                                                                                                                                                                               |
| 4.3                                                                                                                                                                     | What kinds of problems come up when treating child contacts?                                                                   | <ul style="list-style-type: none"> <li>• How do you overcome these problems?</li> </ul>                                                                                                                                                                                                       |
| 4.4                                                                                                                                                                     | What kinds of challenges has delivery of TB prevention services presented for health care workers?                             | <ul style="list-style-type: none"> <li>• How has that affected your workload? <b>PROBE</b> for staff burden</li> <li>• What do you think are the biggest challenges?</li> <li>• How can these challenges be overcome?</li> </ul>                                                              |
| 4.5                                                                                                                                                                     | What about you? Can you describe some of the problems you have encountered with providing TB prevention services?              | <ul style="list-style-type: none"> <li>• How would you fix these problems?</li> </ul>                                                                                                                                                                                                         |
| 4.6                                                                                                                                                                     | Do you think that health care workers believe that TB prevention services will work?                                           | <ul style="list-style-type: none"> <li>• Why or why not?</li> </ul>                                                                                                                                                                                                                           |
| 4.7                                                                                                                                                                     | If you had the opportunity, what would you change about the way TB prevention services are provided in your facility/clinic?   | <ul style="list-style-type: none"> <li>• Can you think of any ways to improve the delivery of health services in relation to TB prevention?</li> </ul>                                                                                                                                        |
| <b>5.Stigma</b>                                                                                                                                                         |                                                                                                                                |                                                                                                                                                                                                                                                                                               |
| We are getting very close to the end of our interview. I just have a few more questions.                                                                                |                                                                                                                                |                                                                                                                                                                                                                                                                                               |
| 5.1                                                                                                                                                                     | Have parents been bringing in their child contacts to the clinic for TB screening?                                             | <ul style="list-style-type: none"> <li>• Why or why not?</li> </ul>                                                                                                                                                                                                                           |
| 5.2                                                                                                                                                                     | Would parents be more likely to have their child contacts screened in the community?                                           | <ul style="list-style-type: none"> <li>• Why or why not?</li> </ul>                                                                                                                                                                                                                           |
| 5.3                                                                                                                                                                     | Do you think that providing IPT to child contacts might expose them or their families to stigma?                               | <ul style="list-style-type: none"> <li>• <b>IF YES</b>, in what ways?</li> </ul>                                                                                                                                                                                                              |
| <b>6. Intervention components</b>                                                                                                                                       |                                                                                                                                |                                                                                                                                                                                                                                                                                               |
| Before we end I'd like to get your feedback about additional intervention components.                                                                                   |                                                                                                                                |                                                                                                                                                                                                                                                                                               |
| 6.1                                                                                                                                                                     | What do you think about VHW screening of child contacts in the community?                                                      | <ul style="list-style-type: none"> <li>• What are the main benefits to that?</li> <li>• What are the main barriers?</li> <li>• How can we strengthen this component?</li> </ul>                                                                                                               |
| 6.2                                                                                                                                                                     | Do you feel that creating job tools such as a clinical algorithm, would be helpful for delivering TB prevention services?      | <ul style="list-style-type: none"> <li>• <b>IF YES</b>, what content would be helpful? How would you like it delivered?</li> </ul>                                                                                                                                                            |
| 6.3                                                                                                                                                                     | Do you feel that creating patient education tools such as a flipchart, would be helpful for delivering TB prevention services? | <ul style="list-style-type: none"> <li>• <b>IF YES</b>, what content would be helpful? How would you like it delivered?</li> <li>• What kind of information would you like to see in the flipchart?</li> <li>• Is there another format in which this information can be delivered?</li> </ul> |
| <b>7.Other</b>                                                                                                                                                          |                                                                                                                                |                                                                                                                                                                                                                                                                                               |
| We are done but I would just like to know a little about you.                                                                                                           |                                                                                                                                |                                                                                                                                                                                                                                                                                               |
| 7.1                                                                                                                                                                     | Please tell me how old you are.                                                                                                |                                                                                                                                                                                                                                                                                               |
| 7.2                                                                                                                                                                     | What is the highest level of education you                                                                                     |                                                                                                                                                                                                                                                                                               |

|     |                                                                   |  |
|-----|-------------------------------------------------------------------|--|
|     | completed?                                                        |  |
| 7.3 | How long have you been employed in this position?                 |  |
| 7.4 | Have I missed anything? Is there something you would like to add? |  |
